# Supplementary material
Source: PubMed Central journal article supplement (PMC4521608)
Supplement: NIHMS706216-supplement-17.pdf [file NIHMS706216-supplement-17.pdf]

**Supplementary Table 1: Guideline values for risk assessment of BaP from various subnational, national and international agencies.**

| Agency                                       | Category                  | Value<br>µg/L | Method                                                                                                                                                                                                                                                                                                                                                                                                                                                                                                                                           | Basis for value                                                                     |
|----------------------------------------------|---------------------------|---------------|--------------------------------------------------------------------------------------------------------------------------------------------------------------------------------------------------------------------------------------------------------------------------------------------------------------------------------------------------------------------------------------------------------------------------------------------------------------------------------------------------------------------------------------------------|-------------------------------------------------------------------------------------|
| WHO (2003)                                   | Health-based guideline    | 0.7           | Oral carcinogenicity in mice using two-stage mutation model. Neal and Rigdon (1967) forestomach tumors                                                                                                                                                                                                                                                                                                                                                                                                                                           | Oral cancer in mice                                                                 |
| Cal/EPA (2010)                               | Public health goal        | 0.007         | Time to tumor model to obtain a lower-bound estimate of dose associated with 10% increased incidence of tumors. Assumed a linear dose-response relationship at low doses. Increased potency factor by 1.7 to correct for early-life exposure. Exposure of 0.052 L/kg bw per day of water (an age-adjusted upper 95th percentile of drinking water consumption for age range for cancer potency correction). q* Cancer potency 1.7 (mg/kg bw per day) <sup>-1</sup> [2.9 (mg/kg bw per day) <sup>-1</sup> when corrected for early-life exposure] | Incidence of oral cavity or forestomach tumors in female mice (Kroese et al., 2001) |
| Cal/EPA (2010)                               | Health protective level   | 4             | LOAEL of 5 mg/kg bw per day from subchronic study. Uncertainty factor of 3000 and RSC of 0.1 and drinking water ingestion of 0.044 L/kg bw per day.                                                                                                                                                                                                                                                                                                                                                                                              | Renal toxicity (Knuckles et al., 2001)                                              |
| U.S. EPA (1994; 2007) Currently under review | Maximum contaminant level | 0.2           | Used Neal and Rigdon (1967) and Rabstein (1973); both incidence of mouse forestomach tumors from feeding study                                                                                                                                                                                                                                                                                                                                                                                                                                   | Reproductive difficulties; increased risk of cancer (stomach)                       |
| NHMRC (2004)                                 | Health-based guideline    | 0.01          | Based on limit of detection, which is slightly less than value derived using a risk assessment from WHO (2003) using Neal and Rigdon (1967).                                                                                                                                                                                                                                                                                                                                                                                                     | Mouse tumors                                                                        |
| Health Canada (1988, reaffirmed in 2005)     | Health-based guideline    | 0.01          | Increased stomach tumors in Neal and Rigdon (1967) feeding study in mice. Used surface area correction and robust linear extrapolation model to estimate lifetime risk associated with 1 µg/L BaP in drinking water of $5 \times 10^{-5}$                                                                                                                                                                                                                                                                                                        | Mouse stomach tumors                                                                |

Supplementary Table 2: All epidemiology studies evaluated.

| Study                                                                                            | Case-control/cohort          | Exposure route                                                                                                 | N                                                                                     | Endpoint                                                                                                                                                                                      | BaP concentration                                                                                                                                                                                    | Outcome                                                                                                                                                                                                                                                                                                                                                                                                                                                                                                                                                                                                                              | Duration of exposure                 | Association with BaP |
|--------------------------------------------------------------------------------------------------|------------------------------|----------------------------------------------------------------------------------------------------------------|---------------------------------------------------------------------------------------|-----------------------------------------------------------------------------------------------------------------------------------------------------------------------------------------------|------------------------------------------------------------------------------------------------------------------------------------------------------------------------------------------------------|--------------------------------------------------------------------------------------------------------------------------------------------------------------------------------------------------------------------------------------------------------------------------------------------------------------------------------------------------------------------------------------------------------------------------------------------------------------------------------------------------------------------------------------------------------------------------------------------------------------------------------------|--------------------------------------|----------------------|
| <b>Inhalation</b>                                                                                |                              |                                                                                                                |                                                                                       |                                                                                                                                                                                               |                                                                                                                                                                                                      |                                                                                                                                                                                                                                                                                                                                                                                                                                                                                                                                                                                                                                      |                                      |                      |
| Arif et al. (2006)                                                                               | Case-control                 | Cigarette smoking (comparison of human tissues from cancer patients)                                           | 50                                                                                    | Highly lipophilic DNA adducts                                                                                                                                                                 | Unknown                                                                                                                                                                                              | DNA adducts are present, but are not related to PAHs or BaP                                                                                                                                                                                                                                                                                                                                                                                                                                                                                                                                                                          | Chronic                              | Negative             |
| Armstrong et al. (1986)                                                                          | Case-control                 | Inhalation among aluminum smelter workers                                                                      | 85 cases and 255 referents                                                            | Bladder cancer                                                                                                                                                                                | 1 mg/m <sup>3</sup>                                                                                                                                                                                  | 2.3% increase in bladder cancer                                                                                                                                                                                                                                                                                                                                                                                                                                                                                                                                                                                                      | Chronic                              | Positive             |
| Armstrong et al. (1994)                                                                          | 1) Case-cohort; 2) Subcohort | Inhalation in aluminum production plant                                                                        | 1) 338<br>2) 1138                                                                     | Lung cancer mortality                                                                                                                                                                         | 1) cumulative < 10, 10-99, 100-199, 200-299, ≥ 300 μg/m <sup>3</sup> -years<br>2) 342.2 μg/m <sup>3</sup> / 190.1 μg/m <sup>3</sup>                                                                  | 1) Smoking-adjusted rate ratio 1.00, 1.48, 2.23, 2.10, 1.87; significance not reported<br>2) probability of causation over 50%; 2) probability of causation over 50% first achieved and according to the upper 95% confidence limit                                                                                                                                                                                                                                                                                                                                                                                                  | ≥ 1 year between 1950 and 1979       | Positive             |
| Armstrong and Thériault (1996)                                                                   | Cohort                       | From compensation claims from lung cancer patients exposed to coal tar pitch volatiles (occupational exposure) | Not reported                                                                          | Lung cancer                                                                                                                                                                                   | 1) 100 μg/m <sup>3</sup> -years<br>2) 342.2 μg/m <sup>3</sup> / 190.1 μg/m <sup>3</sup>                                                                                                              | 1) probability of causation over 50%; 2) probability of causation over 50% first achieved and according to the upper 95% confidence limit                                                                                                                                                                                                                                                                                                                                                                                                                                                                                            | Chronic                              | Positive             |
| Armstrong and Gibbs (2009)                                                                       | Cohort                       | Inhalation from aluminum smelters in Quebec                                                                    | 16 431                                                                                | Lung cancer                                                                                                                                                                                   | 100 μg/m <sup>3</sup> BaP-years of cumulative exposure was                                                                                                                                           | Relative risk = 1.35 (95% CI 1.22-1.51)                                                                                                                                                                                                                                                                                                                                                                                                                                                                                                                                                                                              | at least 1 year of employment        | Positive             |
| Bartsch et al. (1998)                                                                            | Case-control                 | Lung cancer patients vs. controls                                                                              | N/A                                                                                   | BPDE-DNA adducts (also PAH DNA adduct)                                                                                                                                                        | Unknown                                                                                                                                                                                              | CYP1A1 mutation increases BPDE-DNA adducts                                                                                                                                                                                                                                                                                                                                                                                                                                                                                                                                                                                           | chronic                              | Positive             |
| Burstyn et al. (2005)                                                                            | Cohort                       | Inhalation in asphalt workers across Europe                                                                    | 12 367 males                                                                          | Ischemic heart disease mortality                                                                                                                                                              | Highest exposure group was 273+ ng/m <sup>3</sup> and 2013+ ng/m <sup>3</sup> for cumulative exposure                                                                                                | Significant trend with dose and cumulative exposure; 1.64 relative ratio for average exposure and 1.58 in the cumulative exposure                                                                                                                                                                                                                                                                                                                                                                                                                                                                                                    | Minimum of one work season           | Positive             |
| Cross et al. (2010)                                                                              | Cohort                       | Meat and meat component intake as well as meat cooking by-products                                             | Not reported                                                                          | Esophageal and gastric cancer                                                                                                                                                                 | Increased risk estimated for each additional 10 ng/d BaP                                                                                                                                             | No relation for BaP; increased cancer risk was observed for meat consumption                                                                                                                                                                                                                                                                                                                                                                                                                                                                                                                                                         | Chronic                              | Negative             |
| De Flora et al. (1993)                                                                           | Cohort                       | Smoking                                                                                                        | 39 for adducts and 31 for MN                                                          | BPDE-DNA adducts and micronuclei (MN not specific to BaP)                                                                                                                                     | Not defined                                                                                                                                                                                          | Not significant for MN; however, BPDE DNA adducts were significant according to number of cigarettes smoked per day                                                                                                                                                                                                                                                                                                                                                                                                                                                                                                                  | Not defined                          | Positive             |
| De Stefani et al. (2009)                                                                         | Case-control                 | Intake of meat and meat mutagens                                                                               | 846 cases and 846 controls                                                            | Lung cancer                                                                                                                                                                                   | 1) less than 26.9 ng/g; 2) 27.0-42.1 ng/g; 3) 42.2-51.8 ng/g; 4) 51.9+ ng/g                                                                                                                          | BaP significantly associated with risk of lung cancer. 1) OD = 1.0; 2) OD = 1.10; 3) OD = 1.49; 4) OD = 2.08                                                                                                                                                                                                                                                                                                                                                                                                                                                                                                                         | Chronic                              | Positive             |
| Eingholm et al. (1996)                                                                           | Cohort                       | Residents of Copenhagen in comparison with those living in rural areas                                         | 927 470 men and 486 130 women                                                         | Lung cancer                                                                                                                                                                                   | Up to 10 ng/m <sup>3</sup>                                                                                                                                                                           | Region had very small effect, and role of BaP is unclear                                                                                                                                                                                                                                                                                                                                                                                                                                                                                                                                                                             | Chronic                              | Inconclusive         |
| Friesen et al. (2007)                                                                            | Cohort                       | Inhalation at aluminum smelter                                                                                 | 6423 males                                                                            | Bladder and lung cancer incidence, mortality due to myocardial infarction                                                                                                                     | 7.63-122.0 μg/m <sup>3</sup> -year                                                                                                                                                                   | BaP (and benzene-soluble material) were strongly associated with bladder cancer and lung cancer, but modestly associated with myocardial infarction                                                                                                                                                                                                                                                                                                                                                                                                                                                                                  | More than 3 years of work experience | Positive             |
| Friesen et al. (2009)                                                                            | Cohort                       | Inhalation at aluminum smelter                                                                                 | 4316 male smelter workers                                                             | Mortality and cancer incidence                                                                                                                                                                | Unknown                                                                                                                                                                                              | Marginal significance of trend for BaP (also inhalable dust and fluoride exposure)                                                                                                                                                                                                                                                                                                                                                                                                                                                                                                                                                   | Chronic                              | Inconclusive         |
| Gu et al. (2008)                                                                                 | Case-control                 | Smoking                                                                                                        | 203 cases and 198 controls                                                            | BPDE-induced 9p21 aberrations in cultured peripheral blood lymphocytes (bladder cancer)                                                                                                       | Not defined                                                                                                                                                                                          | Increased in individuals with cancer relative to control; BPDE 9p21 aberrations significantly associated with bladder cancer (OR = 5.29, 95% CI = 3.26-8.59)                                                                                                                                                                                                                                                                                                                                                                                                                                                                         | Not defined                          | Positive             |
| Gustavsson et al. (1995)                                                                         | Cohort                       | Inhalation in Swedish graphite electrode plant                                                                 | 901                                                                                   | Mortality and cancer incidence                                                                                                                                                                | In the highest exposure group, cumulative exposure was 33 ug BaP/m <sup>3</sup> -years, mean exposure time was 10.8 years and average exposure level                                                 | No excess risk of death from cancer                                                                                                                                                                                                                                                                                                                                                                                                                                                                                                                                                                                                  | Average of 10.8 years                | Negative             |
| Haugen et al. (1986)                                                                             | Cohort                       | Inhalation in coke oven workers                                                                                | Not reported                                                                          | BPDE-DNA adducts in lymphocytes                                                                                                                                                               | 7.3 μg/m <sup>3</sup> on collected particulate matter                                                                                                                                                | One third of the workers had detectable BPDE-DNA adducts                                                                                                                                                                                                                                                                                                                                                                                                                                                                                                                                                                             | Chronic                              | Positive             |
| He et al. (1991)                                                                                 | Case-control                 | Indoor smoky coal exposure                                                                                     | 110 cases and 426 controls                                                            | Lung cancer mortality                                                                                                                                                                         | 35.60-248.50 μg/100 m <sup>3</sup>                                                                                                                                                                   | Strong association between BaP exposure and lung cancer mortality                                                                                                                                                                                                                                                                                                                                                                                                                                                                                                                                                                    | Chronic                              | Positive             |
| Hemminki et al. (1990)                                                                           | Cohort                       | Inhalation in coke workers                                                                                     | 91                                                                                    | Aromatic DNA adducts in white blood cells                                                                                                                                                     | 0.25-90 μg/m <sup>3</sup>                                                                                                                                                                            | Significant in battery workers in comparison with other jobs; significant in nonbattery workers compared with countryside controls                                                                                                                                                                                                                                                                                                                                                                                                                                                                                                   | Current job considered.              | Positive             |
| Izotti et al. (1991)                                                                             | Case-control                 | Cigarette smoking                                                                                              | 39                                                                                    | BPDE-DNA adducts                                                                                                                                                                              | Unknown                                                                                                                                                                                              | No adducts were detected in samples from nonsmokers or ex-smokers, whereas 84.6% of samples from current smokers exhibited typical fluorescence peaks                                                                                                                                                                                                                                                                                                                                                                                                                                                                                | Chronic                              | Positive             |
| Jeng et al. (2011)                                                                               | Cross-sectional              | Inhalation in coke workers                                                                                     | 1000                                                                                  | IgA, IgE levels (only endpoint relevant to BaP); other endpoints for all PAHs included malondialdehyde (MDA) and 8-OHdG                                                                       | Mean concentrations of 1603.06 ng/m <sup>3</sup> in top-oven workers (considered high-exposure group in this study) and 62.47 ng/m <sup>3</sup> in side-oven workers (considered low-exposure group) | IgA and IgE correlated strongly with BaP exposure; MDA was significantly increased, but not 8-OH-dG                                                                                                                                                                                                                                                                                                                                                                                                                                                                                                                                  | At least 1 year of employment        | Positive             |
| Junior et al. (1994)                                                                             | Cohort                       | Males working in steel foundries                                                                               | 206                                                                                   | BPDE adducts to hemoglobin                                                                                                                                                                    | Assessed by personal air sampling devices; precise air concentrations not reported                                                                                                                   | Air concentrations of BaP not associated with levels                                                                                                                                                                                                                                                                                                                                                                                                                                                                                                                                                                                 | Current job considered               | Negative             |
| Knox et al. (2005)                                                                               | Cohort                       | Home address relative to hotspots for chemical exposure                                                        | 22 258 cancer-related deaths before age of 16                                         | Cancer mortality                                                                                                                                                                              | Not defined                                                                                                                                                                                          | Excess risk of cancer-related death within 0.3 km of hotspots for BaP and many other chemicals including PM <sub>10</sub> , benzene and carbon monoxide                                                                                                                                                                                                                                                                                                                                                                                                                                                                              | Chronic                              | Positive             |
| Lavoué et al. (2007); Gibbs and Sevigny (2007a); and Gibbs and Sevigny (2007b) (four-part study) | Cohort                       | Inhalation in workers from aluminum smelters in Quebec                                                         | Part 1) 28 910 jobs; Part 2) 5977 workers; Part 3) 9726 workers; Part 4) 5977 workers | All cancer incidence and mortality                                                                                                                                                            | 0.01-68.08 μg/m <sup>3</sup>                                                                                                                                                                         | Part 1) looked at exposure; Part 2) causes of death before 1951 significant for bladder cancer, COPD, cancers of stomach, digestive system (unspecified), rectum and rectosigmoid, pancreas and larynx, Alzheimer's disease, cerebrovascular disease; Part 3) cause of death after 1951 significant for COPD and respiratory cancer (also esophagus, rectum and rectosigmoid junction, pancreas, larynx, lung, non-Hodgkin's lymphoma, cerebrovascular disease and asthma; Part 4) overall cancer incidence, significant lung and bladder cancer (BaP specific), laryngeal and buccal cavity cancer also increased with BaP exposure | Chronic                              | Positive             |
| Mumford et al., 1993                                                                             | Cohort                       | Coal or wood smoke during cooking or heating vs. women using natural gas in Beijing                            | 9 Xuan Wei women with chimney; 9 Xuan Wei women without chimney; 9 Beijing controls   | DNA adducts in peripheral blood and cord blood white blood cells and placental tissue                                                                                                         | 19.25 μg/m <sup>3</sup> for smoky coal and 3.24 μg/m <sup>3</sup> for wood                                                                                                                           | More DNA adducts were reported in exposed women but significance is not reported.                                                                                                                                                                                                                                                                                                                                                                                                                                                                                                                                                    | At home throughout lifetime.         | Positive             |
| Mori, 2002                                                                                       | Cohort                       | Inhalation in graphite electrode factory; exposure to coal tar and coal tar pitch volatiles                    | 332 male employees                                                                    | Mortality, all causes                                                                                                                                                                         | Unknown                                                                                                                                                                                              | Increased mortality due to lung cancer (SMR=2.62, compared to 2.35 in general population), lymphatic and haematopoietic cancers (SMR=3.46). Relative contribution of BaP unknown.                                                                                                                                                                                                                                                                                                                                                                                                                                                    | More than 5 years.                   | Inconclusive         |
| Nadon et al. (1995)                                                                              | Case-control                 | Cancer patients vs. controls in Montreal area                                                                  | 3730 cancer patients and 533 controls                                                 | 14 types of cancer (esophagus, stomach, colon, rectum, pancreas, lung († oat cell, squamous cell and adenocarcinoma), prostate, bladder, kidney, melanoma of skin and non-Hodgkin's lymphoma) | Unknown (only estimated as low, medium and high according to questionnaire)                                                                                                                          | Increased cancer cases for stomach, pancreas and prostate; increased lung cancer risk observed in nonsmokers and light smokers only                                                                                                                                                                                                                                                                                                                                                                                                                                                                                                  | Chronic                              | Positive             |

|                          |                     |                                                                                                          |                                                                                                               |                                                                                                                                                          |                                                                                                                                                                                                                                                                        |                                                                                                                                                                                                                                                             |                                               |                       |  |
|--------------------------|---------------------|----------------------------------------------------------------------------------------------------------|---------------------------------------------------------------------------------------------------------------|----------------------------------------------------------------------------------------------------------------------------------------------------------|------------------------------------------------------------------------------------------------------------------------------------------------------------------------------------------------------------------------------------------------------------------------|-------------------------------------------------------------------------------------------------------------------------------------------------------------------------------------------------------------------------------------------------------------|-----------------------------------------------|-----------------------|--|
| Niu et al. (2011)        | Cohort              | Inhalation in coke oven workers                                                                          | 176 coke oven workers and 48 warehouse controls                                                               | Emotional and cognitive function; concentrations of monomine and amino acid neurotransmitters; urinary levels of 1-hydroxypyrene for exposure assessment | Mean concentrations of BaP were 19.5, 185.9 and 1623.5 ng/m <sup>3</sup> at the bottom, side and top of the coke oven, respectively; concentration for controls was 10.2 ng/m <sup>3</sup>                                                                             | 1-OH-Py levels increased; learning and memory decreased; concentrations of norepinephrine decreased; acetylcholinesterase activity decreased; overall, the study shows that exposure to BaP may reduce neurobehavioral function and neurotransmitter levels | Chronic                                       | Positive              |  |
| Ovrebo et al. (1995)     | Cohort              | Inhalation in coke workers                                                                               | 13/- for control, 23/17 for low, 26/18 for medium and 18/15 for high exposure workers (January/June)          | Anti-BPDE-DNA adducts and hydroxyethylvaline hemoglobin adducts; urinary 1-hydroxypyrene as a measure of exposure                                        | high=top side workers, medium=side workers, low=maintenance workers                                                                                                                                                                                                    | Anti-BPDE-DNA adducts did not correlate urinary marker of exposure or cumulative exposure; nonsignificant increase was observed for hydroxyethylvaline-hemoglobin adducts                                                                                   | Chronic                                       | Negative              |  |
| Pan et al. (1998)        | Cohort              | Inhalation in coke oven workers (top, middle and bottom workers, and controls)                           | 25 males                                                                                                      | Urinary 1-hydroxypyrene, leukocyte aromatic DNA adducts, serum p53, glutathione S-transferase M1 (all for PAHs)                                          | Mean BaP level for each worksite of 3.16 µg/m <sup>3</sup> (top), 3.02 µg/m <sup>3</sup> (push side), 0.98 µg/m <sup>3</sup> (coke side), 0.10 µg/m <sup>3</sup> (bottom) and 0.01 µg/m <sup>3</sup> (control); BaP exposure information also available for other PAHs | Serum p53 correlated with cumulative BaP exposure; no correlation was found for DNA adducts and PAH exposure                                                                                                                                                | Chronic                                       | Positive              |  |
| Pastorelli et al. (1996) | Cohort              | Inhalation of BaP from traffic exhaust                                                                   | 53                                                                                                            | BaP diol epoxide adducts with hemoglobin                                                                                                                 | Estimate of 1-3 ng/m <sup>3</sup> in high-traffic areas                                                                                                                                                                                                                | Significant difference observed for high-traffic exposure in nonsmokers                                                                                                                                                                                     | Chronic                                       | Positive              |  |
| Perera et al. (1982)     | Case-control        | Lung cancer patients (normal tissue, tumor tissue and blood samples)                                     | 15                                                                                                            | DNA adducts                                                                                                                                              | Unknown                                                                                                                                                                                                                                                                | Inconclusive due to small sample size                                                                                                                                                                                                                       | Unknown                                       | Inconclusive          |  |
| Perera et al. (1988)     | Cohort              | Inhalation in Finnish foundry workers                                                                    | 35 + 10 controls                                                                                              | DNA adducts in white blood cells                                                                                                                         | Low (< 0.05 µg/m <sup>3</sup> ); medium (0.05-0.2 µg/m <sup>3</sup> ); high (> 0.2 µg/m <sup>3</sup> )                                                                                                                                                                 | Significant for each exposure group                                                                                                                                                                                                                         | Current job considered                        | Positive              |  |
| Perera et al. (1993)     | Cohort              | Inhalation in Finnish foundry workers                                                                    | 48                                                                                                            | HPRT and GPA mutation; DNA adducts                                                                                                                       | < 5-60 µg/m <sup>3</sup>                                                                                                                                                                                                                                               | Not significant for any endpoint                                                                                                                                                                                                                            | Current job considered                        | Negative              |  |
| Phillips et al. (1988)   | Cohort              | Inhalation in Finnish iron foundry                                                                       | 41                                                                                                            | Aromatic DNA adducts in white blood cells                                                                                                                | > 0.2 (high), 0.05-0.2 (medium) and < 0.05 (low)                                                                                                                                                                                                                       | Adducts present in 3/4 (high), 8/10 (medium), 4/18 (low) and 1/9 (controls)                                                                                                                                                                                 | Current job considered                        | Positive              |  |
| Rojas et al. (1995)      | Cohort              | Inhalation in coke workers (smoking, nonsmoking and controls)                                            | 39 exposed, 39 controls                                                                                       | Anti-BPDE-DNA adducts in lymphocytes/monocytes                                                                                                           | Ranging from ≤ 0.15 to ≥ 4 µg/m <sup>3</sup> in year of collection                                                                                                                                                                                                     | ~8 times higher in occupationally exposed individuals                                                                                                                                                                                                       | At least 4-6 months prior to blood collection | Positive              |  |
| Santella et al. (1993)   | Cohort              | Inhalation in workers near or in a Finnish iron foundry                                                  | 48                                                                                                            | PAH-DNA adducts in white blood cells                                                                                                                     | 2-60 ng/m <sup>3</sup>                                                                                                                                                                                                                                                 | Not significant                                                                                                                                                                                                                                             | Chronic                                       | Negative              |  |
| Szczeklik et al. (1994)  | Cohort              | Inhalation in Polish iron workers                                                                        | 274 (199 coke oven workers and 76 cold-rolling mill workers)                                                  | Humoral immunity (IgG, IgA, IgM and IgE concentrations in blood)                                                                                         | 0.2-50 µg/m <sup>3</sup> in coke plant workers was 3-5 times magnitude than in cold-rolling mill employees                                                                                                                                                             | Decreased IgG and IgA in coke oven workers indicating immunosuppression with BaP exposure                                                                                                                                                                   | Average of 15 years                           | Positive              |  |
| Tas et al. (1994)        | Cohort              | Inhalation in two steel foundries and one graphite electrode producing plant                             | 260 (133 controls and 127 exposed)                                                                            | BPDE adducts on albumin                                                                                                                                  | Not clearly defined                                                                                                                                                                                                                                                    | Significantly higher in workers relative to controls; significantly associated with air BaP levels                                                                                                                                                          | Current job considered                        | Positive              |  |
| Winker et al. (1996)     | Cohort              | Inhalation exposure in coke oven workers (one newer/clean facility and another with high levels of PAHs) | 24                                                                                                            | Immunotoxic effects from blood samples                                                                                                                   | New facility = 651 ng/m <sup>3</sup> air; old facility = 5396 ng/m <sup>3</sup>                                                                                                                                                                                        | Reduced mitogenic response of T cells to phytohemagglutinin; impairment of B cell activity; reduced oxidative burst in monocytes after stimulation with <i>E. coli</i> ; no effects on lymphocyte subpopulations and immunoglobulin levels in serum         | 6-30 years                                    | Positive and Negative |  |
| Xu et al. (1996)         | Nested case-control | Inhalation in Chinese iron steel complex                                                                 | 610 lung cancer cases, 292 stomach cancer cases and 959 controls                                              | Lung cancer and stomach cancer cases                                                                                                                     | < 0.84, 0.85-1.96, 1.97-3.2, ≥ 3.2 µg/m <sup>3</sup>                                                                                                                                                                                                                   | Odds ratio of 0.9, 1.7, 1.3, 1.7 for each dose category, respectively; significant trend                                                                                                                                                                    | More than 15 years                            | Positive              |  |
| <b>Ingestion</b>         |                     |                                                                                                          |                                                                                                               |                                                                                                                                                          |                                                                                                                                                                                                                                                                        |                                                                                                                                                                                                                                                             |                                               |                       |  |
| Anderson et al. (2005)   | Case-control        | Meat intake and preparation method                                                                       | 193 cases and 674 controls                                                                                    | Pancreatic cancer                                                                                                                                        | Median 0.3-53.7 ng/day                                                                                                                                                                                                                                                 | OR = 2.2 (1.2-4.0)                                                                                                                                                                                                                                          | Chronic                                       | Positive              |  |
| Butler et al. (2003)     | Case-control        | Meat intake and preparation method                                                                       | 701 African Americans and 957 Caucasians                                                                      | Colon cancer                                                                                                                                             | Mean BaP levels of 22.5 and 16.7 ng/day for African American cases and controls; 41.9 and 35.4 ng/day for white cases and controls                                                                                                                                     | Significant association observed in African Americans only                                                                                                                                                                                                  | Chronic                                       | Positive              |  |
| Cross et al. (2005)      | Case-control        | Meat intake                                                                                              | 29 361                                                                                                        | Prostate cancer                                                                                                                                          | ≥ 1031.5 ng/day                                                                                                                                                                                                                                                        | No association between prostate cancer and BaP intake                                                                                                                                                                                                       | Chronic                                       | Negative              |  |
| Cross et al. (2006)      | Case-control        | Meat intake and preparation method                                                                       | 383 controls and 458 cases                                                                                    | Non-Hodgkin's lymphoma                                                                                                                                   | Mean intake of 37.1 ng/day and median intake of 16.8 ng/day                                                                                                                                                                                                            | No increased risk                                                                                                                                                                                                                                           | Chronic                                       | Negative              |  |
| Ferrucci et al. (2012)   | Case-control        | Meat consumption                                                                                         | 17 072                                                                                                        | Distal colon and rectal adenoma                                                                                                                          | Unknown                                                                                                                                                                                                                                                                | Not associated with colon adenoma but significantly associated with rectal adenoma (OR = 1.53)                                                                                                                                                              | Chronic                                       | Positive              |  |
| Fu et al. (2011)         | Case-control        | Meat and meat-derived mutagen intake                                                                     | 2386 cases and 1703 controls                                                                                  | Breast cancer                                                                                                                                            | Unknown                                                                                                                                                                                                                                                                | Intake of red meat may be associated with breast cancer; however, this correlation does not exist for BaP                                                                                                                                                   | Chronic                                       | Negative              |  |
| Gunter et al. (2005)     | Case-control        | Meat intake and preparation method                                                                       | 628 cases and 689 controls                                                                                    | Colorectal adenoma                                                                                                                                       | > 0.29-515.2 ng/day                                                                                                                                                                                                                                                    | 6% increase of large adenoma per 10 ng/day consumption of BaP                                                                                                                                                                                               | Monitored over the last year                  | Positive              |  |
| Hakami et al. (2008)     | Case-control        | Intake through diet (staple foods including bread and rice) and water in northern Iran                   | 40 cases, 40 controls from the same area and 40 from a low-risk region                                        | Esophageal cancer                                                                                                                                        | For bread + rice + water (data also presented for each food item separately), total daily intake was 99.0, 91.4 and 70.6 ng/day for cases, controls of the same region and low-risk region, respectively                                                               | BaP was significantly higher in cases and controls of the high-risk area, in comparison with the low-risk area; BaP may be associated with esophageal cancer                                                                                                | Chronic                                       | Inconclusive          |  |
| Lam et al. (2009)        | Case-control        | Meat intake                                                                                              | 2120 controls and 2101 cases                                                                                  | Lung cancer                                                                                                                                              | Not well defined                                                                                                                                                                                                                                                       | Significant association for BaP, heterocyclic amines and red meat consumption                                                                                                                                                                               | Chronic                                       | Positive              |  |
| Li et al. (2007)         | Case-control        | Meat intake and preparation method                                                                       | 626 cases and 530 controls                                                                                    | Pancreatic cancer                                                                                                                                        | Mean of 69.9 in cases and 61.2 in controls. Median of 42.3 in cases and 37.3 in controls. These differences were not significant.                                                                                                                                      | BaP was a significant predictor of pancreatic cancer                                                                                                                                                                                                        | Chronic                                       | Positive              |  |
| Sinha et al. (2005a)     | Case-control        | BaP intake from meat and other foods                                                                     | 146 cases and 228 controls                                                                                    | Colorectal adenoma                                                                                                                                       | Median 5 ng/day from meat and 73 ng/day from food in controls; median 17 ng/day from meat and 76 ng/day from other foods in cases                                                                                                                                      | Trend is significant for both meat and food sources; ORs from meat were 1.19, 1.71, 2.16 and 2.82 and from food were 2.61, 4.21, 2.45 and 5.60 for the second, third, fourth and fifth quintiles, respectively                                              | Chronic                                       | Positive              |  |
| Sinha et al. (2005b)     | Case-control        | BaP intake from meat and processed meats                                                                 | 3696 cases and 34 817 controls                                                                                | Colorectal adenoma (left-sided descending sigmoid colon and rectum)                                                                                      | 0.8-168.1 ng/day                                                                                                                                                                                                                                                       | BaP intake associated with marginal elevation of colorectal adenoma risk                                                                                                                                                                                    | Chronic                                       | Positive              |  |
| <b>Dermal exposure</b>   |                     |                                                                                                          |                                                                                                               |                                                                                                                                                          |                                                                                                                                                                                                                                                                        |                                                                                                                                                                                                                                                             |                                               |                       |  |
| Scheepers et al. (2009)  | Cohort              | Nurses who apply ointments containing coal tar                                                           | 35 nurses                                                                                                     | Traces of BaP on hands with and without gloves and 1-hydroxypyrene urinary biomarker                                                                     | 33.0 and 16.4 ng/cm <sup>2</sup> on hands                                                                                                                                                                                                                              | Use of gloves decreased absorption of BaP by 51.5%. Use of suggested protocol reduces absorption of BaP by more than 57%.                                                                                                                                   | Chronic                                       | Positive              |  |
| <b>Human cells</b>       |                     |                                                                                                          |                                                                                                               |                                                                                                                                                          |                                                                                                                                                                                                                                                                        |                                                                                                                                                                                                                                                             |                                               |                       |  |
| Rojas et al. (2004)      |                     | Smoking                                                                                                  | 22 normal bronchial epithelial cells compared with lung parenchyma in smokers and nonsmokers with lung cancer | BaP BPDE-N2-dG (adducts)                                                                                                                                 | Unknown                                                                                                                                                                                                                                                                | Adducts were significantly more elevated in smokers and in bronchial epithelium in comparison with parenchyma                                                                                                                                               |                                               | Positive              |  |

Supplementary Table 3: All rodent and *in vitro* studies evaluated

| Reference                      | Health effect category (reproductive toxicity, developmental toxicity, carcinogenicity, mutagenicity, etc.) | Exposure (acute < 1 month, subchronic < 3 months, chronic > 3 months)                                                                                                                       | Route of exposure (Inhalation, oral, intraperitoneal) | Test material (vehicle, control group, doses, test limit, duration of exposure, dose selection rationale [range-finding study], purity, stability)                                                                                                                                                                                                             | Test animals (species, strain, sex, number, age, acclimation, weight, environmental conditions, diet, water) | Clinical observations, necropsy, histopathology, KEY ENDPOINT                                                                                                                                                                                                                                              | Key events (known or speculated)                                                                           | Findings (MOAs, LD <sub>50</sub> , NOAEL/LOAEL, p-value, relative toxicity compounds) | Quality of study (strengths and weaknesses; use appropriate statistics?) | Notes                                             |
|--------------------------------|-------------------------------------------------------------------------------------------------------------|---------------------------------------------------------------------------------------------------------------------------------------------------------------------------------------------|-------------------------------------------------------|----------------------------------------------------------------------------------------------------------------------------------------------------------------------------------------------------------------------------------------------------------------------------------------------------------------------------------------------------------------|--------------------------------------------------------------------------------------------------------------|------------------------------------------------------------------------------------------------------------------------------------------------------------------------------------------------------------------------------------------------------------------------------------------------------------|------------------------------------------------------------------------------------------------------------|---------------------------------------------------------------------------------------|--------------------------------------------------------------------------|---------------------------------------------------|
| Aboutabl et al. (2009)         | Cardiovascular toxicity                                                                                     | Acute                                                                                                                                                                                       | i.p. injection                                        | 20 mg BaP/kg bw/day for 7 days vs. corn oil control                                                                                                                                                                                                                                                                                                            | SD rats n=6 adults                                                                                           | inc. heart rate, bw, cardiac hypertrophic markers, atrial natriuretic peptide, brain neurotrophin. Inc. gene expression of cyp1a1,1b1,2c1,4f4.                                                                                                                                                             | MOA/AHR necessity test with inhibitors                                                                     | only 1 dose tested                                                                    | weak. Weakness in                                                        | single dose MOA                                   |
| Aboutabl et al. (2011)         | Cardiovascular toxicity                                                                                     | Acute                                                                                                                                                                                       | i.p. injection                                        | 20 mg BaP/kg bw/day for 7 days vs. corn oil control. With & without soluble hydrolase enzyme inhibitor (14,15-DHET,14,15-EET)                                                                                                                                                                                                                                  | SD rat n=4 adults                                                                                            | inc. heart rate, bw, cardiac hypertrophic markers, atrial natriuretic peptide, brain neurotrophin. Inc. gene expression of cyp1a1,1b1,2c1,4f4.                                                                                                                                                             | MOA/AHR necessity test with inhibitors                                                                     | only 1 dose tested                                                                    | weak                                                                     | single dose MOA                                   |
| Carlson and White (1983)       | Cardiovascular toxicity                                                                                     | Acute                                                                                                                                                                                       | i.p. injection                                        | 40 mg BaP/kg bw in corn oil for 72 & 48 hours prior to phenobarbital, trichloroethylene or halothane exposure                                                                                                                                                                                                                                                  | male new zealand rabbits BaP n=7, control n= 20                                                              | BaP weak direct effect to increase number of arrhythmias. BaP somehow facilitates sensitization of myocardium to epinephrine by trichloroethylene to cause arrhythmias                                                                                                                                     | no                                                                                                         | no                                                                                    | many weaknesses                                                          | N                                                 |
| Genitner and Weber (2011)      | Cardiovascular toxicity                                                                                     | Acute                                                                                                                                                                                       | Intranasal                                            | 14 days before dosing, surgery to implant BP device and medicated with midazolam, buprenorphine and isoflurane. Anesthetized with isoflurane                                                                                                                                                                                                                   | male SD rats n=6 group                                                                                       | Thoracic vascular SMCs from congenic AHR <sup>+/+</sup> & AHR <sup>-/-</sup> mice                                                                                                                                                                                                                          | Identified TGFβ2 & IGF-1 as potential candidates for a AHR alternative pathway for cells to respond to BaP | no                                                                                    | no                                                                       | poor study, lack details for not a good key study |
| Kayala et al. (2004)           | Cardiovascular toxicity                                                                                     | Acute                                                                                                                                                                                       | <i>In vitro</i>                                       | 10 μg BaP to ~125–150 mg/kg bw in intact mouse. Vehicle = DMSO for 24 hours                                                                                                                                                                                                                                                                                    | Human macrophages                                                                                            | Identified TGFβ2 & IGF-1 as potential candidates for a AHR alternative pathway for cells to respond to BaP                                                                                                                                                                                                 | postulated                                                                                                 | no                                                                                    | no                                                                       | mechanistic and exploratory                       |
| Matsunawa et al. (2009)        | Cardiovascular toxicity                                                                                     | Acute                                                                                                                                                                                       | <i>In vitro</i> & intranasal                          | 1 μm BaP for 48 hours                                                                                                                                                                                                                                                                                                                                          | Human macrophages                                                                                            | no stated. More mechanistic study                                                                                                                                                                                                                                                                          | no                                                                                                         | no                                                                                    | no                                                                       | mechanistic and exploratory                       |
| NDiave et al. (2006)           | Cardiovascular toxicity                                                                                     | Acute                                                                                                                                                                                       | <i>In vitro</i> & intranasal                          | <i>In vitro</i> ? Intranasal installation of 500 μg BaP in triacrylin vehicle under anesthesia for 24 hours.                                                                                                                                                                                                                                                   | Human primary macrophages. Male adult                                                                        | CCL1 (chemokine involved in in CV diseases and inflammatory response) altered <i>in vivo</i> lung & <i>in vitro</i> by AHR mechanism. Increased early and transient intracellular calcium <i>in vitro</i>                                                                                                  | postulated                                                                                                 | no                                                                                    | no                                                                       | study details not clear                           |
| NDiave et al. (2009)           | Cardiovascular toxicity                                                                                     | Acute                                                                                                                                                                                       | <i>In vitro</i>                                       | 1 μm BaP for 1 hour                                                                                                                                                                                                                                                                                                                                            | Human primary macrophages. Male adult                                                                        | mechanism of CCL1 induction via AHR vs lipoprotein A                                                                                                                                                                                                                                                       | postulated                                                                                                 | no                                                                                    | no                                                                       | mechanistic and exploratory                       |
| Owens et al. (2008)            | Cardiovascular toxicity                                                                                     | Acute                                                                                                                                                                                       | <i>In vitro</i>                                       | AHR activation with B-NF (1 μm) for 16 hours then BaP for 24 hours                                                                                                                                                                                                                                                                                             | n=3 Primary umbilical cells (HuVEC)                                                                          | Pro-inflammatory MOA involving ICAM-1, Caveolae leading to increased vascular endothelial adhesiveness which may be a critical step in development of BaP induced atherosclerosis. AHR dependent metabolism of BaP                                                                                         | postulated                                                                                                 | MOA but not for key study                                                             | mechanistic and exploratory                                              | not useful as mechanistic                         |
| Oesterling-Owens et al. (2009) | Cardiovascular toxicity                                                                                     | Acute                                                                                                                                                                                       | <i>In vitro</i>                                       | AHR activation with B-NF (1 μm) for 16 hours then BaP for 24 hours                                                                                                                                                                                                                                                                                             | n=3 Primary umbilical cells (HuVEC)                                                                          | Flavonoids can protect against BaP induced ICAM-1 mechanism described in Oesterling et al 2008                                                                                                                                                                                                             | postulated                                                                                                 | MOA but not for key study                                                             | mechanistic and exploratory                                              | not useful as mechanistic                         |
| Podecharat et al. (2009)       | Cardiovascular toxicity                                                                                     | Acute                                                                                                                                                                                       | <i>In vitro</i> & intranasal                          | <i>In vitro</i> : 1 μm BaP 24 hours. Vehicle ?? <i>In vivo</i> : 500 μg BaP 24 or 72 hours n=37                                                                                                                                                                                                                                                                | Primary human macrophages & C57/B6                                                                           | BaP represses NPC1 expression via AHR in macrophages which may contribute to macrophage lipid accumulation involved in CV disease.                                                                                                                                                                         | postulated                                                                                                 | MOA but not for key study                                                             | poor reporting of study details                                          | mechanistic not useful as                         |
| Sanyal and Li (2007)           | Cardiovascular toxicity                                                                                     | Acute                                                                                                                                                                                       | i.p. injection                                        | 200 mg BaP/kg bw or corn oil vehicle PD10, 12, 14 evaluated on PD 20                                                                                                                                                                                                                                                                                           | n=20 dams group 60-day old SD rats                                                                           | no effect on maternal or fetal survival rates. Decreased maternal BW, placental toxicity, fetal rupture and hemorrhage of blood vessels in skin, cranial and brain tissues.                                                                                                                                | no                                                                                                         | no                                                                                    | no dose response                                                         | lowest dose but no stats                          |
| Sauzeu et al. (2011)           | Cardiovascular toxicity                                                                                     | Acute                                                                                                                                                                                       | i.p. injection                                        | BaP 10 mg/kg bw for 24 hours                                                                                                                                                                                                                                                                                                                                   | 4-month old Ahr and Vav3 knock-out mice. N=5-7                                                               | Constitutive AHR regulation of Vav3 proto-oncogene to control cardiovascular & respiratory functions does not require AHR activation by BaP                                                                                                                                                                | postulated                                                                                                 | no                                                                                    | no                                                                       | response                                          |
| Kerley-Hamilton et al. (2012)  | Cardiovascular toxicity                                                                                     | Chronic                                                                                                                                                                                     | Gavage & in food                                      | Gavage 10 mg/kg bw/day (5 days/week) for 10 weeks n=5. Food: BaP <i>ad libitum</i> in oil-soaked chow (BaP 800 mL/mL corn oil) estimated dose 10 mg/kg bw/week                                                                                                                                                                                                 | B6 strain (high affinity AHR) & B6-D2 strain <sup>90%</sup> male white leghorn chickens                      | B6 strain altered growth rates of body and several organs and induced atherosclerosis and to a greater extent than in B6-D2. BaP had big impact on gene expression of the aorta (immune responses, muscle-specific genes) which support a MOA of inflammation leading to muscle atherosclerosis            | postulated                                                                                                 | no                                                                                    | no                                                                       | not sufficient to be key                          |
| Pein and Snyder (1988)         | Cardiovascular toxicity                                                                                     | Subchronic                                                                                                                                                                                  | i.m. (pectoral injection)                             | Weekly injection from 4 weeks old to 20 weeks old of 40 mg BaP/kg bw or DMSO, n=6                                                                                                                                                                                                                                                                              | chickens                                                                                                     | Arteriosclerotic plaques in abdominal aorta of all chickens                                                                                                                                                                                                                                                | no                                                                                                         | no                                                                                    | no                                                                       | not sufficient to be key study                    |
| Soremen et al. (2003)          | Cardiovascular toxicity                                                                                     | Hypothetical MOA linking PAH with biological effects. Help with MOA but not useful as key study for BaP assessment                                                                          |                                                       |                                                                                                                                                                                                                                                                                                                                                                |                                                                                                              |                                                                                                                                                                                                                                                                                                            |                                                                                                            |                                                                                       |                                                                          |                                                   |
| Knaapen et al. (2007)          | Cardiovascular toxicity                                                                                     | Acute                                                                                                                                                                                       | Gavage                                                | 5 mg/kg bw or triacrylin vehicle, 2 treatments 1 week apart                                                                                                                                                                                                                                                                                                    | AP0E <sup>-/-</sup> male mice 17 weeks old n=5                                                               | increased mild level of atherosclerosis. MOA: vascular pro-inflammatory effects of BaP by AHR-mediated induction of MCP-1 proposed to lead to increased atherogenesis.                                                                                                                                     | postulated                                                                                                 | MOA but not for key study                                                             | not sufficient to be key study                                           | not sufficient to be key study                    |
| Godschalk et al. (2003)        | Cardiovascular toxicity                                                                                     | Acute                                                                                                                                                                                       | Gavage                                                | High fat/high cholesterol diet for 25 days. Single oral dose of 5 mg BaP/kg bw or triacrylin vehicle                                                                                                                                                                                                                                                           | n=3/reim/diet. Male APOE <sup>-/-</sup> mice                                                                 | After 4 days: increased BPDE-Dna adducts aorta. Decreased LDL & increased HDL. Direct and lipidperoxidation-induced DNA damage by BaP in aorta.                                                                                                                                                            | postulated                                                                                                 | no                                                                                    | poor                                                                     | not sufficient to be key                          |
| Pein (1990)                    | Cardiovascular toxicity                                                                                     | Review paper with MOA, dose range in chicken and mice 0.1–40 mg/kg bw                                                                                                                       |                                                       |                                                                                                                                                                                                                                                                                                                                                                |                                                                                                              |                                                                                                                                                                                                                                                                                                            |                                                                                                            |                                                                                       |                                                                          |                                                   |
| Ferguson (2009)                | Cardiovascular toxicity                                                                                     | Review paper with proposed MOA: mutation of SMC genes relevant to CVD leads to recruitment of macrophages, buildup of foam cells, fatty deposits in vessel wall and then to atherosclerosis |                                                       |                                                                                                                                                                                                                                                                                                                                                                |                                                                                                              |                                                                                                                                                                                                                                                                                                            |                                                                                                            |                                                                                       |                                                                          |                                                   |
| Yang et al. (2009)             | Cardiovascular toxicity                                                                                     | Chronic                                                                                                                                                                                     | Gavage                                                | Olive oil vehicle, 2.5 mg BaP/kg bw/week for 24 weeks                                                                                                                                                                                                                                                                                                          | male C57/B6 mice: APOE <sup>-/-</sup> & APOE <sup>-/-</sup> /overexpress SOD                                 | Increased mean lesion size in aortic tree and root 60% & 40% and increased oxidized lipids. BaP didn't alter lipid peroxidation or atherosclerotic lesions in aorta of any of the APOE <sup>-/-</sup> plus overexpression. Implicate role of ROS in BaP-induced atherosclerosis                            | no                                                                                                         | no                                                                                    | no                                                                       | mechanistic and exploratory                       |
| Curfs et al. (2005)            | Cardiovascular toxicity                                                                                     | Chronic                                                                                                                                                                                     | Gavage                                                | 5 mg/kg bw or triacrylin control 1 time/week for 24 weeks                                                                                                                                                                                                                                                                                                      | Male APOE <sup>-/-</sup> 3 weeks old BaP n=30 control N= 20                                                  | increased plaque size but lesion and number unaffected. No oxidative DNA damage or apoptosis in plaques. Plasma lipoprotein unchanged                                                                                                                                                                      | BaP caused progression of atherosclerosis irrespective                                                     | no                                                                                    | no                                                                       | mechanistic and exploratory                       |
| Curfs et al. (2004)            | Cardiovascular toxicity                                                                                     | Subchronic                                                                                                                                                                                  | Oral                                                  | 5 mg/kg bw or triacrylin control 1 time/week for 12 weeks (n=31) or 24 weeks (n=19)                                                                                                                                                                                                                                                                            | Male APOE <sup>-/-</sup> 5 weeks old                                                                         | Increased greater than 2-fold T-lymphocytes in plaques and increase TGFβ local response                                                                                                                                                                                                                    | postulated                                                                                                 | no                                                                                    | no                                                                       | mechanistic and exploratory                       |
| Ramos and Moorby (2005)        | Cardiovascular toxicity                                                                                     | Review provides MOA information but no dose-response data                                                                                                                                   |                                                       |                                                                                                                                                                                                                                                                                                                                                                |                                                                                                              | Adducts formed. BaP didn't initiate atherosclerotic plaques but accelerates the progression via a local inflammatory response                                                                                                                                                                              | postulated                                                                                                 | no                                                                                    | no                                                                       | mechanistic and exploratory                       |
| Nakamura et al. (2012)         | Developmental/reproductive                                                                                  | Acute                                                                                                                                                                                       | Oral gavage                                           | BaP 0, 2, 10 mg/kg bw (dose selection based on previous study in CD-1 mice)                                                                                                                                                                                                                                                                                    | Male C57/B6 mice                                                                                             | Prenatal exposure to BaP from GD7-16 was dose-dependently associated with sign. 1 testicular and epididymal sperm counts & sperm motility, uterine and placental weights, and litter sizes.                                                                                                                | Data demonstrate an important role of AHR in development                                                   | Experiment 1                                                                          | Findings                                                                 |                                                   |
| Wu et al. (2003)               | Development                                                                                                 | Acute                                                                                                                                                                                       | Nose-only exposure                                    | BaP (97% pure) purchased from Sigma Chemical Co. (St. Louis, MO). GD 11–21.                                                                                                                                                                                                                                                                                    | Female Ahr <sup>-/-</sup> mice                                                                               | Increased placental weight and placental length. Birth index (related to # of birth), BaP metabolism (plasma, cortex), relative % of BaP metabolites in plasma and cortex over time, Cyp1a1 and Ahr gene and protein expression was examined in developing pups (post-natal days PND 0-30, sometimes, 60). | Prenatal BaP exposure → Ahr and Cyp1a1 increased                                                           | Lower birth index at 75 and 100 μg compared to control                                | How much                                                                 | Lengthy explanation                               |
| Mickelze and Angevine (1981)   | Development                                                                                                 | Acute                                                                                                                                                                                       | Oral gavage                                           | BaP from Aldrich; in 0.2 mL corn oil. GD 7–16.                                                                                                                                                                                                                                                                                                                 | CD-1 female mice; doses 0, 10, 40, 160 mg/kg bw                                                              | % pregnant, % viable offspring, mean litter size, reproductive capacity of these animals (treated in utero) later in life.                                                                                                                                                                                 | unknown.                                                                                                   | Lower % viable litter at birth; lowered pup weight                                    | TABLE 1 good for BMD                                                     | Can't do BMD on the                               |
| Shum et al. (1979)             | Development                                                                                                 | Acute                                                                                                                                                                                       | i.p. injection                                        | BaP from Sigma, dissolved in corn oil. GD 7 or 10.                                                                                                                                                                                                                                                                                                             | 'Ahr responsive' strain C57BL/6 (responsive to BaP)                                                          | Developmental abnormalities were studied (% stillborn, resorptions, malformations, etc.)                                                                                                                                                                                                                   | Ahr                                                                                                        | More abnormalities in C57BL/6 (Ahr-responsive)                                        |                                                                          |                                                   |
| Ball (1970)                    | Immune                                                                                                      | Acute                                                                                                                                                                                       | subcutaneous injection                                | Acute (one time) subcutaneous injection of BaP (60 and 120 μg) right after birth induced thymic lymphoma formation (56% incidence vs. 1.5% in controls for 120 μg) while no immunosuppression was observed (hemolysis in group of sheep erythrocytes), unlike DMBM (100% thymic lymphoma, about 50% immunosuppression).                                        |                                                                                                              |                                                                                                                                                                                                                                                                                                            |                                                                                                            |                                                                                       |                                                                          |                                                   |
| Daynes et al. (1979)           | Immune                                                                                                      | n.a.                                                                                                                                                                                        | n.a.                                                  | This paper looked at cotreatments of BaP and immunosuppressive agents, but not at the immunosuppressive properties of BaP.                                                                                                                                                                                                                                     |                                                                                                              |                                                                                                                                                                                                                                                                                                            |                                                                                                            |                                                                                       |                                                                          |                                                   |
| Uroso and Genozian (1980)      | Immune                                                                                                      | Acute                                                                                                                                                                                       | i.p. injection                                        | i.p. injection of BaP (100 and 150 mg/kg bw) at middle (11–13 days) or late (15–18) gestational days led to marked (about 50%) suppression of the anti-sheep erythrocyte plaque-forming response shortly after birth in the progeny and persisted later into life. Tumor frequency was 76 for mid-gestation and 64% for late gestation compared with           |                                                                                                              |                                                                                                                                                                                                                                                                                                            |                                                                                                            |                                                                                       |                                                                          |                                                   |
| Uroso and Genozian (1982)      | Immune                                                                                                      | Acute                                                                                                                                                                                       | i.p. injection                                        | Mice were exposed during gestational development, postnatally or as adults (150 mg BaP/kg bw, once). Animals exposed prenatally were more susceptible to immunosuppression & tumor formation compared with those treated postnatally. Supports the idea that immune deficiency (suppression) influences tumor formation.                                       |                                                                                                              |                                                                                                                                                                                                                                                                                                            |                                                                                                            |                                                                                       |                                                                          |                                                   |
| Uroso and Genozian (1984)      | Immune                                                                                                      | Acute                                                                                                                                                                                       | i.p. injection                                        | Pregnant mice received 150 mg BaP/kg bw during GD 11–17 by i.p. injection. Progeny were assayed for humoral and cell-mediated immune response at various intervals after birth. Immature offspring (1–4 weeks) were severely suppressed in their ability to produce antibody-(plaque-) forming cells (PFC) against sheep red blood cells (SRBC)                |                                                                                                              |                                                                                                                                                                                                                                                                                                            |                                                                                                            |                                                                                       |                                                                          |                                                   |
|                                |                                                                                                             |                                                                                                                                                                                             |                                                       | These data show that <i>in utero</i> exposure to the chemical carcinogen BaP alters development of compounds needed for establishing competent humoral and cell-mediated functions of the immune apparatus and leads to severe and sustained postnatal suppression of the defense mechanism. The immunodeficiency exhibited, particularly in the Tc            |                                                                                                              |                                                                                                                                                                                                                                                                                                            |                                                                                                            |                                                                                       |                                                                          |                                                   |
| Busbee et al. (1984)           | Immune                                                                                                      | sheep lymph was isolated and used                                                                                                                                                           |                                                       | A combination of <i>in vitro</i> and <i>in vivo</i> experiments on sheep or sheep lymphocytes. Showed that BaP is taken by lipoproteins. "We propose that lipophilic xenobiotic compounds interact with cells of the immune system via lymphatic lipoprotein transport of potentially mutagenic, carcinogenic, or immunosuppressive agents."                   |                                                                                                              |                                                                                                                                                                                                                                                                                                            |                                                                                                            |                                                                                       |                                                                          |                                                   |
| Dean et al. (1983)             | Immune                                                                                                      | Acute                                                                                                                                                                                       | subcutaneous injection                                | Adult B6C3F1 mice were exposed to 10 daily subcutaneous injections of BaP in corn oil for 14 days (oil, 30, 200 and 400 mg/kg bw). Exposures of mice to BaP resulted in a reduced number of IgM and IgG antibody plaque-forming cells                                                                                                                          |                                                                                                              |                                                                                                                                                                                                                                                                                                            |                                                                                                            |                                                                                       |                                                                          |                                                   |
| White et al. (1984)            | Immune                                                                                                      | Acute                                                                                                                                                                                       | subcutaneous injection                                | Female B6C3F1 mice, subcutaneous injection of 0, 5, 20 or 40 mg BaP/kg bw in corn oil. On day 11, all mice received sheep red blood cells (SRBC, i.p.). On day 15 animals were sacrificed, spleens dissociated into single-cell suspension and were accessed for the number of anti-SRBC antibody-forming cells producing IgM. Plaques were counted            |                                                                                                              |                                                                                                                                                                                                                                                                                                            |                                                                                                            |                                                                                       |                                                                          |                                                   |
| Wojdani and Alfred (1984)      | Immune                                                                                                      | Acute                                                                                                                                                                                       | i.p. injection                                        | C57, C3H and DBA mice, 8 weeks old, were dosed with phytohemagglutinin injection to activate splenic lymphocytes and 24, 96 or 216 hours later were treated with BaP (0, 2.5, 10, 50 mg/kg bw BaP single i.p. injection in oil). Isolated, T-cell-enriched mononuclear cell populations were assayed for Ahr hydroxylase activity, if possible.                |                                                                                                              |                                                                                                                                                                                                                                                                                                            |                                                                                                            |                                                                                       |                                                                          |                                                   |
| Holladay (1994)                | Immune                                                                                                      | Acute                                                                                                                                                                                       | gavage                                                | <i>In utero</i> exposure to BaP (0, 50, 100, 150 mg/kg bw/day on GD 13–17 by gavage), and offspring were examined at GD 18. Thymic atrophy, cellular depletion (e.g. CD4+8+ fetal thymocytes). So, BaP → thymic hypoplasia, inhibits thymomatous process, fetal liver hypoplasia, including cells with hematopoietic subpopulations. Da                        |                                                                                                              |                                                                                                                                                                                                                                                                                                            |                                                                                                            |                                                                                       |                                                                          |                                                   |
| Uroso (2008)                   | Immune                                                                                                      | Acute                                                                                                                                                                                       | i.p. injection                                        | Pregnant dams of C3H/Anf mice received 150 μg/kg bw on the 12th day of pregnancy by i.p. injection. On day 18, dams were killed and fetuses were removed. Livers were removed and processed (adherent [macrophages, B cells and others?] and non-adherent cells [T cells] were collected). Then, splenic responder (R) and stimulatory (S) cells were cultured |                                                                                                              |                                                                                                                                                                                                                                                                                                            |                                                                                                            |                                                                                       |                                                                          |                                                   |
| Atlan and Sherr (2010)         | Immune                                                                                                      | <i>in vitro</i> cells                                                                                                                                                                       |                                                       | Peripheral blood mononuclear cells (PBMC) were prepared from individual blood donors, depleted of T cells and stained with FITC-labeled CD2-specific antibody and purified (B cells). Plasma cell generation: B cells were plated in irradiated CD40L-transfected L cells. After 4 days of coculture, B cells were harvested and sent to                       |                                                                                                              |                                                                                                                                                                                                                                                                                                            |                                                                                                            |                                                                                       |                                                                          |                                                   |
| Fischer et al. (2011)          | Immune                                                                                                      | Subchronic                                                                                                                                                                                  | oral subcutaneous injection                           | Wistar rats, 9–13 weeks old, were fed daily with 150 mg/kg bw for 30 days. Bone marrow and spleen cell numbers were reduced in BaP-treated samples (~70% and 45% reduction, respectively). This is just one of the experiments. Also did some <i>in vitro</i> (cell culture) experiments.                                                                      |                                                                                                              |                                                                                                                                                                                                                                                                                                            |                                                                                                            |                                                                                       |                                                                          |                                                   |
| Smith (2010)                   | Immune                                                                                                      | Subchronic                                                                                                                                                                                  | injection                                             | Compared several models of delayed hypersensitivity using mouse foot pad swelling as endpoint. Female B6C3F1 mice 8–15 weeks of age were challenged with BaP in corn oil sc (subcutaneously) for 14 days at 5, 20 and 40 mg/kg bw. Then, three different antigens were used, and BaP-mediated effect was seen in all three                                     |                                                                                                              |                                                                                                                                                                                                                                                                                                            |                                                                                                            |                                                                                       |                                                                          |                                                   |
| Uroso (2008)                   | Immune                                                                                                      | Acute                                                                                                                                                                                       | i.p. injection                                        | In this study, C3H mice were injected once with BaP (150 μg/kg bw) at day 12 of pregnancy and progeny lymphoid tissues were excised during gestation (day 18, GD 18) or at 1 or 6 weeks postpartum. The isolated lymphoid cells were analyzed by flow cytometry/immunofluorescence or assessed for function. In BaP-exposed fetuses, thymic T                  |                                                                                                              |                                                                                                                                                                                                                                                                                                            |                                                                                                            |                                                                                       |                                                                          |                                                   |
| Davila et al. (1996)           | Immune                                                                                                      | <i>in vitro</i> human cells                                                                                                                                                                 |                                                       | Examined the toxic effects of nine different PAHs on human peripheral blood T cell mitogenesis. Found that BaP was highly immunotoxic. Also showed that α-naphthoflavone (ANF), which functions as both an AHR antagonist and an inhibitor of cytochrome P450 activity, was able to block the suppressive effect of BaP. Mitogenesis = induced                 |                                                                                                              |                                                                                                                                                                                                                                                                                                            |                                                                                                            |                                                                                       |                                                                          |                                                   |
| Atlan et al. (2006)            | Immune                                                                                                      | <i>in vitro</i> human cells                                                                                                                                                                 |                                                       | The AHR is a ligand-activated transcription factor that mediates immunosuppression by environmental PAHs. Previous studies demonstrated that activation of mature human B cells upregulates AHR expression, suggesting that human B cells are direct PAH targets. To test this hypothesis and to determine the metabolic requirement                           |                                                                                                              |                                                                                                                                                                                                                                                                                                            |                                                                                                            |                                                                                       |                                                                          |                                                   |
| Galván et al. (2006)           | Immune                                                                                                      | Acute                                                                                                                                                                                       | i.p. injection                                        | Four-week-old C57BL/6J mice were injected intraperitoneally with 50 mg BaP/kg bw. Mice were sacrificed 12, 24 and 48 hours after intraperitoneal injection with oil vehicle, BaP and bone marrow cells were purified. BaP treatment decreased the pro-pre B-lymphocytes and did not affect the immature B-lymphocytes or mature                                |                                                                                                              |                                                                                                                                                                                                                                                                                                            |                                                                                                            |                                                                                       |                                                                          |                                                   |
| Lee and Uroso (2007)           | Immune                                                                                                      | <i>in vitro</i> studies with isolated spleen cells                                                                                                                                          |                                                       | Spleens of C3H/HeJ (source of responder, R cells) and CBY/D2 (source of stimulator cells, S cells) mice, 11–12 weeks of age were removed and made into cellular suspensions. The effect of BaP on the cellular proliferative response in response to allogeneic mixed lymphocyte response (MLR) on concanavalin (only R cells are                              |                                                                                                              |                                                                                                                                                                                                                                                                                                            |                                                                                                            |                                                                                       |                                                                          |                                                   |



|                                                                    |                                                                                                            |                                                        |                                                                                          |                                                                                                                                                                                                                                                                                                                                                                                                                                                                                             |                                                                                                                                                                                |                                                                                                                                                                                                                                                                                                                                                                                                                                                                                                                                                                                                                                                                                                                                                                                                                                                                                                                                                                                                                                                                                                                          |                                                                                                                                                                                             |                                                                                                                                                                      |                                                                                                                                         |
|--------------------------------------------------------------------|------------------------------------------------------------------------------------------------------------|--------------------------------------------------------|------------------------------------------------------------------------------------------|---------------------------------------------------------------------------------------------------------------------------------------------------------------------------------------------------------------------------------------------------------------------------------------------------------------------------------------------------------------------------------------------------------------------------------------------------------------------------------------------|--------------------------------------------------------------------------------------------------------------------------------------------------------------------------------|--------------------------------------------------------------------------------------------------------------------------------------------------------------------------------------------------------------------------------------------------------------------------------------------------------------------------------------------------------------------------------------------------------------------------------------------------------------------------------------------------------------------------------------------------------------------------------------------------------------------------------------------------------------------------------------------------------------------------------------------------------------------------------------------------------------------------------------------------------------------------------------------------------------------------------------------------------------------------------------------------------------------------------------------------------------------------------------------------------------------------|---------------------------------------------------------------------------------------------------------------------------------------------------------------------------------------------|----------------------------------------------------------------------------------------------------------------------------------------------------------------------|-----------------------------------------------------------------------------------------------------------------------------------------|
| Dent (2007)                                                        | Review: Strengths and limitations of using repeat-dose toxicity studies to predict effects on reproductive | Acute                                                  | Oral                                                                                     | Four treatment groups (n = 9/group): (1) control, (2) lead (Pb), given 1 g PbCl <sub>2</sub> in drinking water until mating; (3) BaP (10 mg/kg body weight by oral gavage on days 7–16 of pregnancy); (4) combined lead and BaP. Dose selection rationale: lead dose was comparable to blood levels seen in occupational                                                                                                                                                                    | Male and female F0 Female Bom/NMRI Mice were mated. At 9 weeks of age, F0 females were                                                                                         | Could rodent functional effects be predicted in a sub-chronic study? Yes/No (Reference) If yes, nature of effect: For BaP - Yes (Archibong et al., 2003) Testis: reduced weight; sperm analysis: reduced sperm motility and density (no testicular histology quoted). Also raised LH levels. The chromium compounds, some of the cadmium compounds (cadmium fluoride, cadmium chloride, and cadmium sulphate), hexachlorocyclopentadiene, 1,2-dibromo-3-chloroethane, 2,4-dinitrophenol, and 2,4,6-trinitrophenol, showed a significant indication that the compounds in combination 1 # offspring, # litters, and litter size; results suggest that lead and BaP have synergistic effects on the impairment of fertility                                                                                                                                                                                                                                                                                                                                                                                                | The testicular effects that were predictive of functional effects could be the result of a number of                                                                                        | Intelligent testing strategies therefore need to be developed which can take into account data from a wide variety of                                                | Review focuses on a panel of test chemicals to determine the strengths of their dose selection for lead and BaP marked reduction in the |
| Kristensen et al. (1995)                                           | Reproductive                                                                                               | Acute                                                  | Oral                                                                                     | BaP (0, 10, 40 or 160 mg/kg-day) by gavage on days 7-16 of gestation. Corn oil vehicle, controls given corn oil. Male breeding study: F1 males were placed with 2 virgin untreated females every 5 days for 25 days, at gestation day 14-19, females were sacrificed and # implants, fetuses and resorptions were recorded (F2 young were examined for gross abnormalities). Female breeding study: F1 males                                                                                | Adult male and female CD-1 Mice; each test group n=30 or n=60 treated pregnant dams. Male breeding study: F1 males                                                             | No maternal toxicity or embryolethality at any dose. Decrease pup weight all doses. 160 mg/kg-day of BaP resulted in a reduced percentage of mice that were pregnant, reduced number of viable litters at parturition, and reduced mean pup weight at 20 and 42 days post-parturition. Mean pup weight was also significantly reduced at 20 or 42 days post-parturition in females that received 10 mg/kg-day or greater of BaP. Male offspring of dams treated with 10, 40 or 160 mg/kg-day and then bred with untreated females yielded decreased fertility (10 mg/kg or greater), with almost no pregnant females when the males were exposed to either 40 or 160 mg/kg-day in utero. Similarly, fertility was reduced in female                                                                                                                                                                                                                                                                                                                                                                                      |                                                                                                                                                                                             | LOAEL 10 mg/kg/day decreased fertility index in both male and females. Data demonstrate a sensitivity of fetal gonads.                                               | Multi-generational study: exposure of F0 pregnant females for 10.                                                                       |
| Mackenzie and Angevine (1981)                                      | Reproductive (bit of developmental)                                                                        | Acute                                                  | Oral gavage                                                                              | BaP (0, 10, 40 or 160 mg/kg-day) by gavage on days 7-16 of gestation. Corn oil vehicle, controls given corn oil. Male breeding study: F1 males were placed with 2 virgin untreated females every 5 days for 25 days, at gestation day 14-19, females were sacrificed and # implants, fetuses and resorptions were recorded (F2 young were examined for gross abnormalities). Female breeding study: F1 males                                                                                | Adult male and female CD-1 Mice; each test group n=30 or n=60 treated pregnant dams. Male breeding study: F1 males                                                             | A statistically significant ↑ in sperm hyperactivation was observed at concentrations of BaP ≥ 50 µg/mL; Acrosome Halo Test: [BaP] ≥ 25 µg/mL significantly ↓ the percentage of halo formation, indicating an inappropriate (false) acrosome reaction                                                                                                                                                                                                                                                                                                                                                                                                                                                                                                                                                                                                                                                                                                                                                                                                                                                                    |                                                                                                                                                                                             | Conclusion: BaP significantly affected sperm functional- acrosome reaction in vitro, as evidenced by increased                                                       | Acute in vitro study, but results seen were statistically                                                                               |
| Mukhopadhyay et al. (2010) Fertility and Sterility 94(2): 595-598. | Reproductive                                                                                               | Acute                                                  | In vitro (BaP was mixed with media)                                                      | Semen collected from 13 fertile, normozoospermic, non-smoking men; spermatozoa were washed and treated with BaP: 12.5, 25, 50, 100 µg/mL. Dose range selection was based on previously described studies and sperm survival studies done in their lab (1 hour exposure)                                                                                                                                                                                                                     | In vitro study to examine the effects of BaP on sperm hyperactivation and acrosome reaction by computer-assisted semen                                                         | Ovaries were analyzed for follicle loss and markers of apoptosis (TUNEL, Caspase 3, Caspase 8, Bax, Bcl-2, Fas and FasL). Cigarette smoke exposure induced a significant ↓ in the number of primordial follicles, but not growing or antral follicles. Mainstream cigarette smoke exposure had no effect on any marker of apoptosis measured. Exposure of ovaries to BaP in vitro resulted in an ↑ in the pro-survival marker Bcl-2, but no change in apoptosis. Significant reductions in the number of follicles in different stages of development in ovaries of mice exposed to cigarette smoke                                                                                                                                                                                                                                                                                                                                                                                                                                                                                                                      | Data suggest that cigarette smoke-induced follicle loss is not mediated via BaP-induced apoptosis. Findings suggest that a decreased                                                        | Good study with in vivo and in vitro components to the research                                                                                                      |                                                                                                                                         |
| Tuttle et al. (2009)                                               | Reproductive                                                                                               | In vivo subchronic (8 weeks) in vitro acute (24 hours) | Inhalation (nose-only)                                                                   | In vivo: 2 cigarettes/day, exposed 5 days/week for a total of 8 weeks, including the 2-week lead-up period. In vitro BaP: 1-10000 ng/ml (24 h exposure)                                                                                                                                                                                                                                                                                                                                     | Mice and isolated murine ovaries (in vivo in vitro); female C57BL/6J genetic background (B6.129-Gelmt1Tjka, hereafter referred to as Gclm <sup>-/-</sup> ).                    | We observed no changes in fertility, testicular weights, testicular sperm head counts, or testicular histology and subtle changes in cauda epididymal sperm counts, motility, and morphology in Gclm <sup>-/-</sup> compared to Gclm <sup>+/+</sup> males. Prenatal exposure to BaP from gestational day 7 to 16 was dose-dependently associated with significantly decreased testicular and epididymal weights, testicular and epididymal sperm counts, and with vacuolated seminiferous tubules at 10 weeks of age. Gclm <sup>-/-</sup> males exposed prenatally to BaP had greater increases in testicular weights, testicular sperm head counts, epididymal sperm counts, and epididymal sperm motility than Gclm <sup>+/+</sup> littermates. These results show no effect of BaP significantly inhibited follicle growth & cell proliferation at concentrations of 1.5 ng/ml and higher, an effect attenuated by co-incubation with AHR antagonists. BaP caused a significant ↓ in oestradiol and anti-Müllerian hormone (AMH) output, an effect attenuated by co-treatment with 1 of the 2 AHR antagonists tested. | MOA - AHR agonist; mechanisms of BaP induced follicle toxicity remain unknown. Cross-talk between the AHR and                                                                               | Results suggest that the adverse effects of BaP on follicle growth, steroidogenesis and AMH output are mediated.                                                     | In vitro model best represents in vivo scenario as concentrations                                                                       |
| Nakamura et al. (2012)                                             | Reproductive                                                                                               | Acute                                                  | Gavage                                                                                   | Dams were treated by oral gavage with 2 or 10 mg/kg BaP (Sigma-Aldrich Supelco, >99.8% purity) in sesame oil daily from GD7 to GD16. Control animals were given the same volume of sesame oil alone                                                                                                                                                                                                                                                                                         | Male Wistar rats (~320 total); age = 6-7 weeks; weight = 130 ± 40g;                                                                                                            | Combined effects included: 1 # Spermatozooids, 1 viability, 1 duration of motility, 1 resistance in NaCl and HCl; relative weights of testes, seminal vesicles & epididymis (data ambiguous due to combined dosing of 3 different substances)                                                                                                                                                                                                                                                                                                                                                                                                                                                                                                                                                                                                                                                                                                                                                                                                                                                                            |                                                                                                                                                                                             | Physiologically relevant exposure: cigarette smoke does not increase the rates of apoptosis in the ovaries and by                                                    | Good study with in vivo and in vitro components to the research                                                                         |
| Neal et al. (2010)                                                 | Reproductive                                                                                               | Acute                                                  | In vitro (BaP in media)                                                                  | BaP: 0, 0.5, 1.0, 1.5, 5.0 and 50.0 ng/ml, with or without 5 µmol/l resveratrol (n=6) or 5 µmol/l 3,4-DMF (n=7); dose selection based on physiological concentrations previously measured in human follicular fluid. (5 days)                                                                                                                                                                                                                                                               | In vitro study using isolated rat follicles; ovaries (n=6) from 22-26 day old female Wistar rats                                                                               |                                                                                                                                                                                                                                                                                                                                                                                                                                                                                                                                                                                                                                                                                                                                                                                                                                                                                                                                                                                                                                                                                                                          | MOA - AHR agonist; mechanisms of BaP induced follicle toxicity remain unknown. Cross-talk between the AHR and                                                                               | Results suggest that the adverse effects of BaP on follicle growth, steroidogenesis and AMH output are mediated.                                                     | In vitro model best represents in vivo scenario as concentrations                                                                       |
| Pallanaviciene et al. (2006)                                       | Reproductive                                                                                               | Acute                                                  | Oral                                                                                     | Cadmium: 0.1, 0.5, 1.92, 4.0 mg/kg; BaP: 0.00015, 0.0015, 33.3 (7 Type in publication?); 10.0 mg/kg; Pyrene: 0.00075, 0.0075, 20.0, 90.0 mg/kg; Exposure duration: 14, 28 & 90 days; Combined exposures performed, oral administration at 1ml/100g BW/day; Vehicle = rape seed oil; 40 groups, 6 control groups (3 water, 3 oil), n=12/10/group                                                                                                                                             | Male Wistar rats (~320 total); age = 6-7 weeks; weight = 130 ± 40g;                                                                                                            | Combined effects included: 1 # Spermatozooids, 1 viability, 1 duration of motility, 1 resistance in NaCl and HCl; relative weights of testes, seminal vesicles & epididymis (data ambiguous due to combined dosing of 3 different substances)                                                                                                                                                                                                                                                                                                                                                                                                                                                                                                                                                                                                                                                                                                                                                                                                                                                                            |                                                                                                                                                                                             | Physiologically relevant exposure: cigarette smoke does not increase the rates of apoptosis in the ovaries and by                                                    | Good study with in vivo and in vitro components to the research                                                                         |
| Ramesh et al. (2008)                                               | Reproductive                                                                                               | Subchronic                                             | Inhalation (nose-only)                                                                   | Treatment group = 75 µg BaP/m <sup>3</sup> , 4 h daily for 60 days (1 sperm cycle); Control group = unexposed (UNC). Dose selection rationale: exposure concentration selected as it adversely affected reproductive outcomes in male and female rats in a previous study by these authors and is within a range                                                                                                                                                                            | Adult Male F-344 rats; age = -12-13 weeks; weight = -340-360g; n=10/group; carbon black used as a carrier for BaP. Like a hybrid (C57BL/6J-CBA/Ca) mice (13 day old mice, n=2) | Blood samples were collected on day 60 (time 0), and subsequently at 24, 48 & 72 hr to assess plasma testosterone (T) and luteinizing hormone (LH). BaP exposure reduced testis weight and caused significant reductions in the components of the steroidogenic and spermatogenic compartments of the testis. Progressive motility and mean density of stored spermatozoa were reduced. Plasma [T] were decreased by two-thirds in BaP exposed rats, concomitant with increased concentrations of LH in BaP-exposed rats. BaP treatment inhibited (p < 0.05) antral follicle development, decreased estradiol output and follicle survival at the 45.0 ng/ml dose. BaP exposure decreased AMH output overall during preantral (p = 0.014) and antral (p = 0.026) follicle development but had no effect on progesterone output or oocyte growth and nuclear maturation in surviving follicles.                                                                                                                                                                                                                           | MOA: AHR and ARNT discussed                                                                                                                                                                 | These data suggest that sub-chronic exposure to inhaled BaP contribute to reduced testicular and epididymal                                                          | Poor quality of writing was poor (English was not the first language of the authors) Well written paper with many relevant references   |
| Sadeu and Foster (2011) Reproductive Toxicology 31: 402-408.       | Reproductive                                                                                               | Acute                                                  | In vitro                                                                                 | BaP: DMSO & 0 ng/ml BaP (controls), 1.5, 5, 15 & 45 ng/ml. Dose Selection is representative of follicular fluid concentrations in women exposed to mainstream and/or sidestream cigarette smoke: sub-acute (13 days)                                                                                                                                                                                                                                                                        | Female C57BL/6N Mice; 6 weeks of age; water and standard mouse chow ad libitum; 1 week acclimatization before                                                                  | Dose- and time-dependent decrease in # of corpora lutea; 15 weeks of age; water and standard mouse chow ad libitum; 1 week acclimatization before                                                                                                                                                                                                                                                                                                                                                                                                                                                                                                                                                                                                                                                                                                                                                                                                                                                                                                                                                                        |                                                                                                                                                                                             | Data suggest that BaP is an important toxic component of cigarette smoke that adversely affects follicular                                                           | The advantage and physiologically relevant aspect of the ions.                                                                          |
| Swartz and Mattison (1985)                                         | Reproductive                                                                                               | Acute                                                  | Single i.p. injection, studied mice at weekly intervals from 1 to 4 weeks post-injection | BaP: 1, 5, 10, 50, 100 & 500 mg/kg. Vehicle = corn oil (1 acute exposure, studied 1, 2, 3 & 4 weeks post-exposure (designed to study the effect of BaP on ovarian function in intact mice not stimulated with exogenous gonadotropins)                                                                                                                                                                                                                                                      | Female Sprague-Dawley rats, n=6 per group; BW = 80-100g; age = 5 weeks; access to purified water and standard chow                                                             | Dose- and time-dependent decrease in # of corpora lutea; 15 weeks of age; water and standard mouse chow ad libitum; 1 week acclimatization before                                                                                                                                                                                                                                                                                                                                                                                                                                                                                                                                                                                                                                                                                                                                                                                                                                                                                                                                                                        |                                                                                                                                                                                             | 1 week after treatment: threshold of ~1mg/kg, ED50 of 1.6 mg/kg P<0.05                                                                                               | Not corpora lutea present in BP-treated and control mice                                                                                |
| Xu et al. (2010)                                                   | Reproductive                                                                                               | Subchronic                                             | Oral                                                                                     | BaP: 5 & 10 mg/kg; di-(2-ethylhexyl)phthalate (DEHP): 300 & 600 mg/kg; or combination of BaP & DEHP, control (corn oil). Exposure: alternate days for 60 days; Dose Selection: dietary exposure to BaP and DEHP is likely as both are found in urban and rural water. Doses used are higher than the levels found in the general environment, but may be relevant in areas where the specific BaP in cigarettes: 6-40ng/cigarette; 20 cigarettes in 8 h, could inhale 0.067-0.568 µg of BaP | Female Sprague-Dawley rats, n=6 per group; BW = 80-100g; age = 5 weeks; access to purified water and standard chow                                                             | BaP and DEHP exert oestrogenic and suppression of sex hormone (17β-estradiol), secretion and homeostasis, which is associated with prolonged estrous cycles, decreases in ovarian follicle populations and granulosa cell apoptosis involving a PPAR-mediated signaling pathway of action of the two chemicals. [ovarian weight & ovary weight/BW ratios in treatment groups; PPAR-α mRNA & PPAR-γ mRNA & protein expression. With ↑ in the dose of BaP + DEHP, there was a dose-response trend of prolonged duration in the EC and the LH phases of the estrous cycle.                                                                                                                                                                                                                                                                                                                                                                                                                                                                                                                                                  | Granulosa cell apoptosis involving a PPAR-mediated signaling pathway of the two chemicals. Some AHR could interfere with observed following                                                 | Based on qualitative assessment of the combined toxicity, no interaction effects were observed following                                                             | Excellent review with respect to adducts specific to BaP                                                                                |
| Zenzes (2000)                                                      | Reproductive                                                                                               | review paper                                           | Inhalation (smoking)                                                                     | BaP in cigarettes: 6-40ng/cigarette; 20 cigarettes in 8 h, could inhale 0.067-0.568 µg of BaP                                                                                                                                                                                                                                                                                                                                                                                               | Human oocytes - A total of 156 (54 smokers & 102 nonsmokers) women undergoing IVF, classified as non-smokers (n = 102).                                                        | BaP's reactive metabolic binds covalently to DNA, forming adducts. Smoking-related adducts were detectable in ovarian granulosa-lutein cells, oocytes, spermatozoa & preimplantation embryos. Transmission of altered DNA from smoking by spermatozoa was demonstrated in preimplantation embryos and in association with increased risk of childhood cancer.                                                                                                                                                                                                                                                                                                                                                                                                                                                                                                                                                                                                                                                                                                                                                            | Discusses DNA damage with respect to adducts specific to BaP                                                                                                                                | Excellent review with respect to adducts specific to BaP                                                                                                             | Review paper for BaP (focused on tobacco smoke)                                                                                         |
| Zenzes et al. (1995)                                               | Reproductive                                                                                               | Chronic                                                | Inhalation (smoking)                                                                     | Women included in study categorized based on smoking frequency. (meiotic maturation of human oocytes) - chronic                                                                                                                                                                                                                                                                                                                                                                             | Human oocytes - A total of 156 (54 smokers & 102 nonsmokers) women undergoing IVF, classified as non-smokers (n = 102).                                                        | Found higher frequencies of diploid oocytes in smokers than in non-smokers, and a very significant dose effect (increased frequency with increased smoking). The observed increased proportion of analysable oocytes in the smoker group suggests an earlier delay in oocyte maturation, compared with non-smokers.                                                                                                                                                                                                                                                                                                                                                                                                                                                                                                                                                                                                                                                                                                                                                                                                      |                                                                                                                                                                                             | Study shows that external factors, like cigarette smoking, may be hazardous to the viability and function of developing                                              | Good paper with direct relevance to human fertility and BaP alone                                                                       |
| Zhao et al. (2011)                                                 | Reproductive                                                                                               | Chronic                                                | Oral - Najing city (China) tap water                                                     | Control = drinking water free of toxins; treatment = Najing tap water with contaminant levels determined by GC/MS. (90 days)                                                                                                                                                                                                                                                                                                                                                                | Male mice, age = 3 weeks old (n=40), weight = 18±1 g                                                                                                                           | In treated mice, flow cytometry analysis of testicular tissue indicated that the relative percentage of the elongated spermatid (HC) decreased significantly. Also slight increases in the relative percentage of round spermatids (IC) and primary spermatocytes (4C) were noted. The ratios of 4C:2C (diploid germ cells) and 1C:2C increased, and testicular histopathology indicated an expansion of interstitial space and a decreased number and size of Leydig cells in treated mice.                                                                                                                                                                                                                                                                                                                                                                                                                                                                                                                                                                                                                             |                                                                                                                                                                                             | Current study suggests that Nanjing City tap water is toxic to the reproductive system of mice and additional study                                                  | Drinking water study, including polycyclic aromatic hydrocarbons                                                                        |
| Zheng et al. (2010)                                                | Reproductive                                                                                               | Chronic                                                | Oral gavage                                                                              | (90 days) Rats were randomly divided into 7 groups; 2 groups received DBP + BaP (DBP+BaP: 50+1 or 250+5 mg/kg/day), 4 groups received DBP or BaP alone (DBP: 50 or 250 mg/kg/day; BaP: 1 or 5 mg/kg/day), and 1 group received vehicle alone (corn oil = control). Dose selection: 1hr.                                                                                                                                                                                                     | Adult male Sprague-Dawley rats, age = 5 weeks old; BW = 70-100g; n=16/group                                                                                                    | ED2- testicular macrophages (reactive with a differentiation-related antigen present on the resident macrophages) were activated and IL-1β secretion was enhanced. DBP and BaP acted additively, as demonstrated by greater IL-1β secretion relative to each compound alone. These observations suggest that exposure to DBP plus BaP exerted greater suppression on testosterone production compared with each compound alone. DBP and BaP enhances the mRNA and protein expression of IL-1β in testicular macrophages. Exposure to DBP and BaP alters testicular macrophage subset expression and enhances the ability and efficiency of resident macrophages to secrete IL-1β, a significantly suppresses testosterone.                                                                                                                                                                                                                                                                                                                                                                                               | Hypothetical representation of the effects of chronic exposure to DBP and BaP on testicular macrophage function and testosterone production in the testis of rat (figure 6, n = 36). Testis | Findings suggest that co-exposure to DBP and BaP had additive effects on increased mRNA expression of IL-1β, although this did not occur in a dose-dependent manner. |                                                                                                                                         |

**Supplemental Table 4.** BMD model fit parameters for apical endpoints in Table 3. Benchmark response: BMD<sub>10</sub>/BMDL<sub>10</sub> for quantal data (tumor) and BMD<sub>1SD</sub>/BMDL<sub>1SD</sub> continuous data (Neurotoxicity, developmental, immunotoxicity and mutations).

| Reference             | Effect                 | Best Model  | AIC   | P-value | BMD          | BMDL          |
|-----------------------|------------------------|-------------|-------|---------|--------------|---------------|
| Chen et al. (2012)    | Developmental toxicity | Hill        | 191.1 | 1.0     | 0.09 (0.05†) | 0.05 ( 0.02†) |
| De Jong et al. (1999) | Immunotoxicity         | Exponential | 333.5 | 0.6     | 14.0 (7.6†)  | 8.9 (4.8†)    |
| Lemieux et al. (2011) | Mutations: forestomach | Linear      | 148.3 | 0.6     | 0.49         | 0.3           |
| Lemieux et al. (2011) | Mutations: lung        | Linear      | 137.7 | 0.1     | 2.2          | 1.4           |
| Lemieux et al. (2011) | Mutations: liver       | Power       | 121.1 | 1.0     | 7.2          | 4.8           |
| Culp et al. (1998)    | Forestomach Tumor      | LogLogistic | 96.5  | 0.4     | 0.83         | 0.54          |
| Wester et al. (2012)  | Forestomach Tumor      | Multistage  | 179.9 | 1.0     | 1.54 (0.83†) | 0.75(0.41†)   |
| Wester et al. (2012)  | Liver Tumor            | LogLogistic | 127.8 | 0.5     | 3.27 (1.77†) | 2.36 (1.28†)  |

† For comparison of rat and mouse BMDLs were scaled from rat to mouse by multiplying rat values by C based on the assumption that the physiological processes scale with body weight to the <sup>3</sup>/<sub>4</sub> power (allometric scaling).

**Supplementary Table 5: Custom gene list for PCR arrays, including housekeeping genes (denoted by one \*) and controls (denoted by two \*\*).**

| <b>Gene</b> | <b>Syml Refseq #</b> | <b>Official Full Name</b>                                     |
|-------------|----------------------|---------------------------------------------------------------|
| Bax         | NM_007527            | Bcl2-associated X protein                                     |
| Bcl2        | NM_009741            | B-cell leukemia/lymphoma 2                                    |
| Blk         | NM_007549            | B lymphoid kinase                                             |
| Blnk        | NM_008528            | B-cell linker                                                 |
| Btk         | NM_013482            | Bruton agammaglobulinemia tyrosine kinase                     |
| Cd19        | NM_009844            | CD19 antigen                                                  |
| Ccnb2       | NM_007630            | Cyclin B2                                                     |
| Ccnd1       | NM_007631            | Cyclin D1                                                     |
| Ccng1       | NM_009831            | Cyclin G1                                                     |
| Cd19        | NM_009844            | CD19 antigen                                                  |
| Cd3g        | NM_009850            | CD3 antigen, gamma polypeptide                                |
| Cd40lg      | NM_011616            | CD40 ligand                                                   |
| Cd8a        | NM_001081110         | CD8 antigen, alpha chain                                      |
| Cd8b1       | NM_009858            | CD8 antigen, beta chain 1                                     |
| Cdkn1a      | NM_007669            | Cyclin-dependent kinase inhibitor 1A (P21)                    |
| Cxcr5       | NM_007551            | Chemokine (C-X-C motif) receptor 5                            |
| Cyp1a1      | NM_009992            | Cytochrome P450, family 1, subfamily a, polypeptide 1         |
| Cyp1b1      | NM_009994            | Cytochrome P450, family 1, subfamily b, polypeptide 1         |
| Cyr61       | NM_010516            | Cysteine rich protein 61                                      |
| Dock2       | NM_033374            | Dedicator of cyto-kinesis 2                                   |
| Gadd45a     | NM_007836            | Growth arrest and DNA-damage-inducible 45 alpha               |
| Gadd45g     | NM_011817            | Growth arrest and DNA-damage-inducible 45 gamma               |
| Gsta1       | NM_008181            | Glutathione S-transferase, alpha 1 (Ya)                       |
| Gsta2       | NM_008182            | Glutathione S-transferase, alpha 2 (Yc2)                      |
| Mdm2        | NM_010786            | Transformed mouse 3T3 cell double minute 2                    |
| Mgmt        | NM_008598            | O-6-methylguanine-DNA methyltransferase                       |
| Nqo1        | NM_008706            | NAD(P)H dehydrogenase, quinone 1                              |
| Pdgfa       | NM_008808            | Platelet derived growth factor, alpha                         |
| Pmaip1      | NM_021451            | Phorbol-12-myristate-13-acetate-induced protein 1             |
| Polk        | NM_012048            | Polymerase (DNA directed), kappa                              |
| Sesn2       | NM_144907            | Sestrin 2                                                     |
| Srxn1       | NM_029688            | Sulfiredoxin 1 homolog (S. cerevisiae)                        |
| Tnfrsf10b   | NM_020275            | Tumor necrosis factor receptor superfamily, member 10b        |
| Trp53inp1   | NM_021897            | Transformation related protein 53 inducible nuclear protein 1 |
| Ugt1a9      | NM_201644            | UDP glucuronosyltransferase 1 family, polypeptide A9          |
| Vegfa       | NM_009505            | Vascular endothelial growth factor A                          |
| Vegfc       | NM_009506            | Vascular endothelial growth factor C                          |
| Zmat3       | NM_009517            | Zinc finger matrin type 3                                     |
| Gusb*       | NM_010368            | Glucuronidase, beta                                           |
| Hprt*       | NM_013556            | Hypoxanthine guanine phosphoribosyl transferase               |
| Gapdh*      | NM_008084            | Glyceraldehyde-3-phosphate dehydrogenase                      |
| MGDC**      | SA_00106             | Mouse Genomic DNA Contamination                               |
| RTC**       | SA_00104             | Reverse Transcription Control                                 |
| PPC**       | SA_00103             | Positive PCR Control                                          |





















**Supplementary Table 8.** BMD modeling parameters for the lowest BMD<sub>low</sub> values at the 10th percentile of all genes in a pathway for different approaches for POD derivation.

| Issue        | Approach                                            | Gene count | IPA Pathway                                               | # probes with B | BMD <sup>a</sup> | Gene <sup>a</sup> | BMD List                                                                              | BMD List              | # probes with B                                                                                                                                                                                                                                                                                            | Log <sub>10</sub> (BMD) List | Log <sub>10</sub> (BMD) List |
|--------------|-----------------------------------------------------|------------|-----------------------------------------------------------|-----------------|------------------|-------------------|---------------------------------------------------------------------------------------|-----------------------|------------------------------------------------------------------------------------------------------------------------------------------------------------------------------------------------------------------------------------------------------------------------------------------------------------|------------------------------|------------------------------|
| Liver        | Metagenomics key event preceding the committed step | 34(24)     | Cell Cycle: G1/S Checkpoint Regulation                    | 18              | 8.1              | 1.0               | 11, 2245452; 6, 1417514.2; 4, 3388; 38, 4101; 39, 3633                                | 22770, 2773, 0, 51    | 145702, 72885, 44, 91553, 27, 74456, 33, 744893, 71, 107176, 47, 408112, 42, 468374, 32, 625013, 74, 622873, 61, 21817, 87, 738441, 44, 622087, 40, 612486, 67, 720287, 40, 91771, 61, 104479, 38, 629198, 61, 682766                                                                                      |                              |                              |
|              | Metagenomics lowest MCM-associated pathway          | 34(24)     | Cell Cycle: G1/S Checkpoint Regulation                    | 18              | 8.1              | 1.0               | 4, 32357; 6, 45232; 10, 11, 1854548; 5, 1417514.2; 4, 3388; 38, 4101; 39, 3633        | 42279, 2773, 0, 51    | 149702, 72885, 44, 91553, 27, 74456, 33, 744893, 71, 107176, 47, 409112, 42, 468373, 32, 625013, 74, 622873, 61, 21817, 87, 738441, 44, 622087, 40, 612486, 67, 720287, 40, 91771, 61, 104479, 38, 629198, 61, 682766                                                                                      |                              |                              |
|              | Metagenomics lowest pathway                         | 34(24)     | Neuron Signaling                                          | 7               | 0.3              | 0.2               | 12, 73002; 9, 27238; 1, 18725; 0, 157628; 22, 6304; 35, 4455; 31, 109148; 47, 9182    | 32963, 4692, 0, 51    | 147844, 47, 296784, 26, 38, 370287, 46, 691987, 44, 68602, 17, 629028, 73, 652294, 48, 820274, 43, 644694                                                                                                                                                                                                  |                              |                              |
| Lung         | Metagenomics key event preceding the committed step | 28(24)     | Cell Cycle: DNA/DNA Damage Checkpoint Regulation          | 5               | 14.8             | 1.7               | 11, 8376; 18, 1444; 1, 8376; 48, 17802; 10, 7244; 37, 1056; 37, 7734                  | 10760, 2414, 0, 18    | 332483, 28, 888742, 22, 33, 849187, 25, 773489, 37, 448109, 61, 63866, 11, 67119                                                                                                                                                                                                                           |                              |                              |
|              | Metagenomics lowest MCM-associated pathway          | 28(24)     | Cell Cycle: DNA/DNA Damage Checkpoint Regulation          | 5               | 14.8             | 1.7               | 11, 8376; 18, 1444; 1, 8376; 48, 17802; 10, 7244; 37, 1056; 37, 7734                  | 10760, 2414, 0, 18    | 332483, 28, 888742, 22, 33, 849187, 25, 773489, 37, 448109, 61, 63866, 11, 67119                                                                                                                                                                                                                           |                              |                              |
|              | Metagenomics lowest pathway                         | 28(24)     | Cellular Effects of Silencing (Via)gna                    | 9               | 15.7             | 2.1               | 12, 9776; 18, 4502; 1, 8376; 48, 17802; 10, 7244; 37, 1056; 37, 7734                  | 10560, 5163, 0, 18    | 4, 2358; 119, 882873, 22, 40, 47072, 31, 365746; 63, 647724; 33, 405614; 26, 88438; 34, 878652; 36, 046556; 50, 193724; 66, 227593                                                                                                                                                                         |                              |                              |
| Fore stomach | Metagenomics key event preceding the committed step | 28(24)     | IGF Signaling                                             | 40              | 11.4             | 7.4               | 7, 51405; 10, 9897; 2, 26767; 20, 670; 23, 6247; 32, 6252; 7, 4956; 67, 47387; 7, 308 | 1424, 3481, 0, 16     | 2278717, 17, 382953, 23, 38, 65343, 26, 764106; 38, 793848; 57, 877971; 44, 68418; 40, 918496; 34, 685842; 42, 87828; 22, 686971; 37, 835487; 41, 853786; 31, 598078; 45, 89308; 67, 833543; 40, 434833; 26, 69346; 56, 688843; 25, 699202; 38, 388448; 71, 818848; 39, 638767; 19, 253196; 38, 614993; 48 |                              |                              |
|              | Metagenomics lowest MCM-associated pathway          | 28(24)     | IGF Signaling                                             | 40              | 11.4             | 7.4               | 7, 51405; 10, 9897; 2, 26767; 20, 670; 23, 6247; 32, 6252; 7, 4956; 67, 47387; 7, 308 | 1424, 3481, 0, 16     | 2278717, 17, 382953, 23, 38, 65343, 26, 764106; 38, 793848; 57, 877971; 44, 68418; 40, 918496; 34, 685842; 42, 87828; 22, 686971; 37, 835487; 41, 853786; 31, 598078; 45, 89308; 67, 833543; 40, 434833; 26, 69346; 56, 688843; 25, 699202; 38, 388448; 71, 818848; 39, 638767; 19, 253196; 38, 614993; 48 |                              |                              |
|              | Metagenomics lowest pathway                         | 28(24)     | Protein/Lipid Degradation (V) (Mammalian, via Side Chain) | 6               | 16.1             | 4.5               | 16, 7734; 16, 4843; 6, 394146; 7, 8; 9, 85744; 8, 65012; 37, 873; 38, 641654; 8954    | 10560, 0, 7442, 0, 28 | 11, 1028454; 420712; 3, 21, 383281; 0, 841424; 12, 56976; 26, 368895; 24, 038787; 38, 64989                                                                                                                                                                                                                |                              |                              |

<sup>a</sup> In mg BAP/kg bw per day  
<sup>b</sup> Similar to Thomas et al., (2011) but corrected BMD-BMD<sub>low</sub> at the 10th percentile rather than median.
